# Supplementary material for: Attitude and Level of COVID-19 Vaccination among Women in Reproductive Age during the Fourth Pandemic Wave: A Cross-Sectional Study in Poland
Source: MDPI journal article supplement (doi:10.3390/ijerph19116872), 2022-06-04
Supplement: s1 [file s1]

## Supplementary Materials

**Table S1.** Level of COVID-19 knowledge in relation to sociodemographic variables.

|                                                                                                                                               | Sociodemographic data        |           |                                 |                                 |                               |
|-----------------------------------------------------------------------------------------------------------------------------------------------|------------------------------|-----------|---------------------------------|---------------------------------|-------------------------------|
|                                                                                                                                               | Continuous Data <sup>a</sup> |           | Categorical Data <sup>b</sup>   |                                 |                               |
|                                                                                                                                               | Age                          | BMI       | Residence <sup>A</sup>          | Education <sup>B</sup>          | Marital Status <sup>C</sup>   |
| Were you afraid of SARS-CoV-2 infection during pregnancy/lactation?                                                                           | $p = 0.0007$                 | $p = 0.7$ | $\chi^2 15.59$<br>$p = 0.21$    | $\chi^2 37.32$<br>$p = 0.00001$ | $\chi^2 23.88$<br>$p = 0.002$ |
| Did you suffer from COVID-19 during your pregnancy?                                                                                           | $p = 0.1$                    | $p = 0.7$ | $\chi^2 18.33$<br>$p = 0.005$   | $\chi^2 11.40$<br>$p = 0.02$    | $\chi^2 3.72$<br>$p = 0.44$   |
| Is SARS-CoV-2 transmitted through breastfeeding?                                                                                              | $p = 0.007$                  | $p = 0.3$ | $\chi^2 21.29$<br>$p = 0.001$   | $\chi^2 20.92$<br>$p = 0.0003$  | $\chi^2 17.33$<br>$p = 0.001$ |
| Does breastfeeding protect children from COVID-19?                                                                                            | $p = 0.03$                   | $p = 0.7$ | $\chi^2 16.04$<br>$p = 0.01$    | $\chi^2 26.11$<br>$p = 0.00003$ | $\chi^2 7.26$<br>$p = 0.12$   |
| Do you think that immunity achieved after COVID-19 vaccination might provide immune protection to the fetus and newborn (placental transfer)? | $p = 0.001$                  | $p = 0.6$ | $\chi^2 60.92$<br>$p = 0.00001$ | $\chi^2 74.46$<br>$p = 0.00001$ | $\chi^2 12.91$<br>$p = 0.01$  |
| Do you think that immunity achieved after COVID-19 vaccination might be transferred with human milk to the newborns/infants?                  | $p = 0.1$                    | $p = 0.4$ | $\chi^2 14.56$<br>$p = 0.02$    | $\chi^2 34.04$<br>$p = 0.00001$ | $\chi^2 15.80$<br>$p = 0.003$ |

<sup>a</sup> the Kruskal–Wallis test was used to evaluate the differences between the groups

<sup>b</sup> the chi-squared test was used to evaluate the differences between the groups

<sup>A</sup> place of the residence: >100,000 inhabitants, 10,000–100,000 inhabitants, <10,000 inhabitants and rural area

<sup>B</sup> education level: university, high school, primary and vocational

<sup>C</sup> marital status: married, cohabiting, single parent and divorced

**Table S2.** Level of COVID-19 knowledge in relation to obstetric variables.

|                                                                                                                                               | Obstetric data <sup>a</sup>          |                                 |                                      |                                                 |                                             |                                      |
|-----------------------------------------------------------------------------------------------------------------------------------------------|--------------------------------------|---------------------------------|--------------------------------------|-------------------------------------------------|---------------------------------------------|--------------------------------------|
|                                                                                                                                               | Current obstetric state <sup>A</sup> | Type of delivery <sup>B</sup>   | Physiological pregnancy <sup>C</sup> | Difficulties in conceiving a child <sup>D</sup> | Medically assisted procreation <sup>E</sup> | Miscarriage in the past <sup>F</sup> |
| Were you afraid of SARS-CoV-2 infection during pregnancy/lactation?                                                                           | $\chi^2 9.16$<br>$p = 0.68$          | $\chi^2 41.56$<br>$p = 0.00004$ | $\chi^2 3.20$<br>$p = 0.52$          | $\chi^2 1.22$<br>$p = 0.87$                     | $\chi^2 4.66$<br>$p = 0.32$                 | $\chi^2 3.13$<br>$p = 0.53$          |
| Did you suffer from COVID-19 during your pregnancy?                                                                                           | $\chi^2 7.36$<br>$p = 0.28$          | $\chi^2 14.17$<br>$p = 0.02$    | $\chi^2 5.60$<br>$p = 0.06$          | $\chi^2 7.49$<br>$p = 0.02$                     | $\chi^2 4.28$<br>$p = 0.11$                 | $\chi^2 6.31$<br>$p = 0.04$          |
| Is SARS-CoV-2 transmitted through breastfeeding?                                                                                              | $\chi^2 3.08$<br>$p = 0.79$          | $\chi^2 23.28$<br>$p = 0.0007$  | $\chi^2 3.84$<br>$p = 0.14$          | $\chi^2 1.93$<br>$p = 0.38$                     | $\chi^2 0.17$<br>$p = 0.91$                 | $\chi^2 2.44$<br>$p = 0.29$          |
| Does breastfeeding protect children from COVID-19?                                                                                            | $\chi^2 5.82$<br>$p = 0.44$          | $\chi^2 11.59$<br>$p = 0.07$    | $\chi^2 4.60$<br>$p = 0.10$          | $\chi^2 0.17$<br>$p = 0.91$                     | $\chi^2 0.73$<br>$p = 0.69$                 | $\chi^2 2.25$<br>$p = 0.32$          |
| Do you think that immunity achieved after COVID-19 vaccination might provide immune protection to the fetus and newborn (placental transfer)? | $\chi^2 9.74$<br>$p = 0.13$          | $\chi^2 13.25$<br>$p = 0.03$    | $\chi^2 1.69$<br>$p = 0.42$          | $\chi^2 0.26$<br>$p = 0.87$                     | $\chi^2 1.91$<br>$p = 0.38$                 | $\chi^2 2.61$<br>$p = 0.27$          |
| Do you think that immunity achieved after COVID-19 vaccination might be transferred with human milk to the newborns/infants?                  | $\chi^2 7.92$<br>$p = 0.24$          | $\chi^2 12.42$<br>$p = 0.05$    | $\chi^2 6.57$<br>$p = 0.03$          | $\chi^2 1.47$<br>$p = 0.47$                     | $\chi^2 1.69$<br>$p = 0.42$                 | $\chi^2 7.09$<br>$p = 0.02$          |

<sup>a</sup> the chi-squared test was used to evaluate the differences between the groups

<sup>A</sup> current obstetric state: pregnancy, a woman who gave birth to a child

<sup>B</sup> type of delivery: vaginal birth, elective or emergency caesarean section

<sup>C</sup> physiological pregnancy: with or without complications

<sup>E</sup> difficulties in conceiving a child: yes, no

<sup>F</sup> miscarriage in the past: yes, no

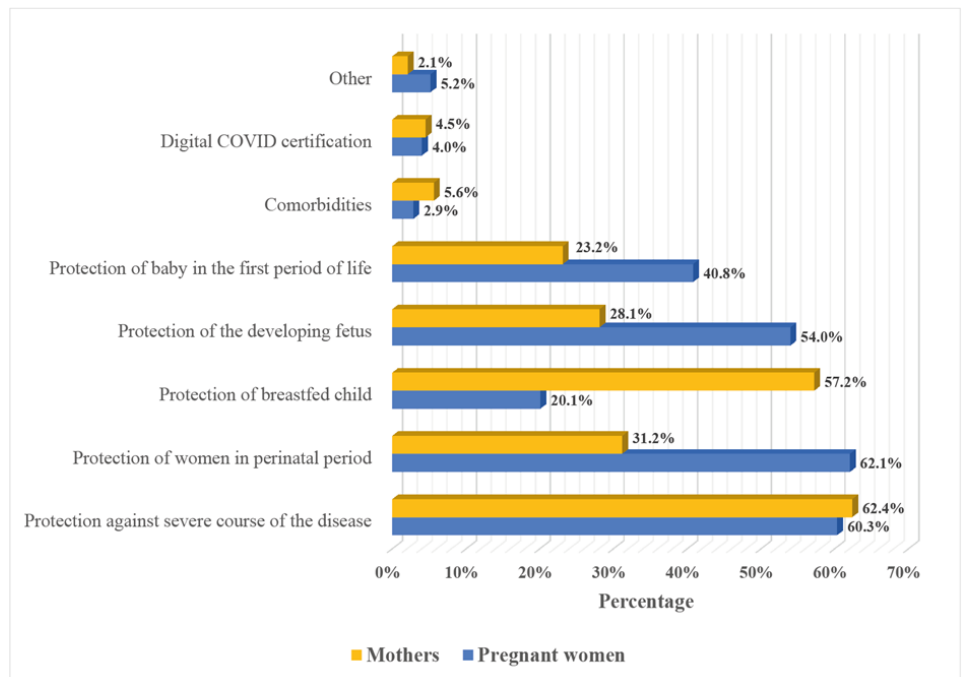

**Figure S1.** Respondents' reasons for COVID-19 vaccination.

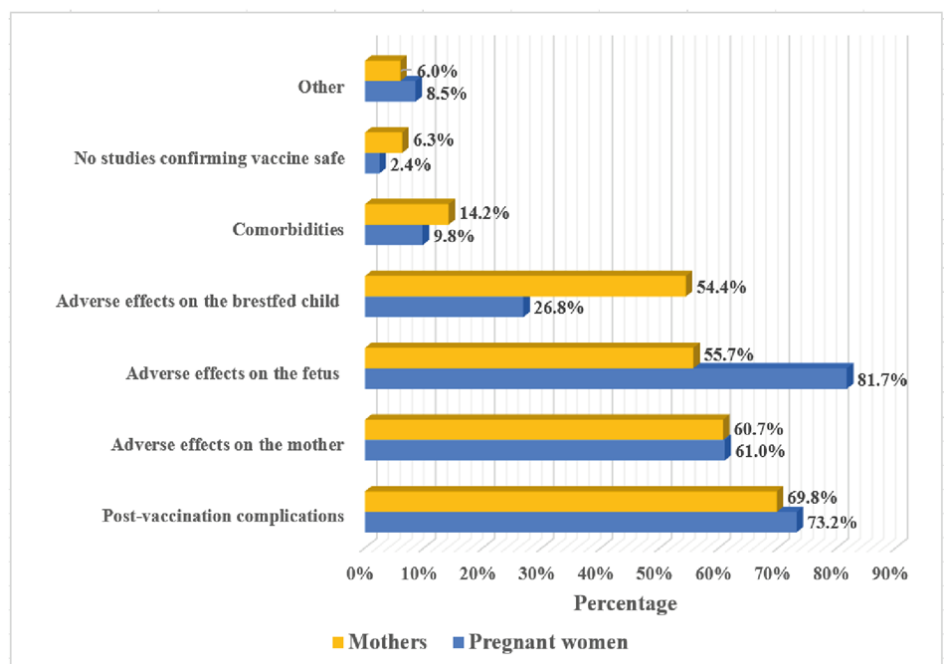

**Figure S2.** Reasons to avoid COVID-19 vaccination declared by analyzed cohort of respondents.
